# Supplementary material for: Post-polymerization photografting on methacrylate-based monoliths for separation of intact proteins and protein digests with comprehensive two-dimensional liquid chromatography hyphenated with high-resolution mass spectrometry
Source: PubMed Central journal article supplement (PMC4412387; doi:10.1007/s00216-015-8615-4), 2015-03-24
Supplement: 216_2015_8615_MOESM1_ESM.pdf [file 216_2015_8615_MOESM1_ESM.pdf]

**Analytical and Bioanalytical Chemistry**

**Electronic Supplementary Material**

**Post-polymerization photografting on methacrylate-based monoliths for separation of intact proteins and protein digests with comprehensive two-dimensional liquid chromatography hyphenated with high-resolution mass spectrometry**

Rudy J. Vonk, Sam Wouters, Andrei Barcaru, Gabriel Vivó-Truyols, Sebastiaan Eeltink,  
Leo J. de Koning, Peter J. Schoenmakers

## Aim

In this article we tried to optimize the two-step post-polymerization photografting conditions of 2-acrylamido-2-methyl-1-propanesulfonic acid (AMPS) to a monolithic butyl methacrylate copolymerized with ethylene glycol dimethacrylate (poly(BMA-*co*-EDMA)). Two different polymerization batches were investigated, details can be found in Table S1. Parameters to optimize the photografting conditions were selected based via an experimental design. Three grafting parameters, of the two-step post-polymerization photografting, were chosen to yield in the highest binding capacity of the resin (*i.e.* the grafting time of the initiator ( $t_1$ ), the monomer concentration ( $c_m$ ) and the monomer irradiation time ( $t_2$ )). All 15 different grafting conditions can be found in Table S2. The photografted columns were implemented in comprehensive two-dimensional liquid chromatography for the analyzes of proteins and protein digest. Finally we demonstrated the ability to hyphenate the setup with a high-resolution Fourier-transform ion-cyclotron mass spectrometer (FTICR-MS/MS) for the analyses of a BSA digest.

## Modeling of the photografting conditions using an experimental design

The quantitative breakthrough of BTMAC (50% height) was used as the response for the modelling. In Fig. S1A a sub-set of three grafting conditions (1-3, identical to conditions from Fig. 3B) were compared to the breakthrough capacity of the maximum predicted optimum condition ( $t_1 = 3.4$  min,  $t_2 = 6.4$  min,  $c_m = 8.1\%$ ) (5). This resulted in an experimental capacity which was higher than the predicted experimental capacity (4) ( $Y_{\text{exp}} = 100$   $\mu\text{g}$  per mL column volume *vs.*  $Y_{\text{pred}} = 65 \pm 40$   $\mu\text{g}$  per mL column volume). We applied the quadratic model, without interaction, to calculate the predicted binding capacities at the various grafting conditions (Fig. S1C). The yellow color indicates high  $Y_{\text{pred}}$  and the grafting conditions resulting in the blue region result in a low  $Y_{\text{pred}}$ .

**Table S1** Polymerization details (w/w %) of the two batches used for single-step photografting (batch I) and two-step grafting (batch II)

| Chemical                                          | Batch I                       | Batch II                      |
|---------------------------------------------------|-------------------------------|-------------------------------|
| BMA                                               | 13.3                          | 16                            |
| EDMA                                              | 20                            | 24                            |
| cyclohexanol                                      | 20.7                          | 5                             |
| 1-decanol                                         | 46                            | 55                            |
| DMPA*                                             | 6                             | 1                             |
| wavelength (nm)                                   | 365                           | 254                           |
| Irradiation time (min)                            | 5                             | 20                            |
| <i>n</i>                                          | 15                            | 61                            |
| $K_v (\times 10^{-15}) \text{ m}^2 \text{ (RSD)}$ | $213 \pm 24 \text{ (11.4\%)}$ | $127 \pm 15 \text{ (11.7\%)}$ |

\* percentages of initiator with respect to the monomer concentration.

**Table S2** Grafting conditions selected in the experimental design for optimization of post-polymerization grafting

| Experiment | $t_1$ (min) | $t_2$ (min) | $c_m$ (% (w/w)) | $c$ (mg/mL) * | <i>n</i> |
|------------|-------------|-------------|-----------------|---------------|----------|
| 1          | 2           | 4           | 5               | $67 \pm 3$    | 2        |
| 2          | 2           | 4           | 10              | $63 \pm 11$   | 2        |
| 3          | 2           | 10          | 5               | $57 \pm 4$    | 3        |
| 4          | 2           | 10          | 10              | $68 \pm 1$    | 2        |
| 5          | 6           | 4           | 5               | $56 \pm 4$    | 2        |
| 6          | 6           | 4           | 10              | $41 \pm 3$    | 2        |
| 7          | 6           | 10          | 5               | $51 \pm 3$    | 2        |
| 8          | 6           | 10          | 10              | $75 \pm 11$   | 2        |
| 9          | 4           | 7           | 7.5             | $62 \pm 9$    | 2        |
| 10         | 0.6         | 7           | 7.5             | $78 \pm 2$    | 3        |
| 11         | 7.4         | 7           | 7.5             | $59 \pm 2$    | 2        |
| 12         | 4           | 2           | 7.5             | $58 \pm 5$    | 2        |
| 13         | 4           | 12          | 7.5             | $47 \pm 5$    | 2        |
| 14         | 4           | 7           | 3.3             | $39 \pm 9$    | 2        |
| 15 **      | 4           | 7           | 11.3            | $89 \pm 6$    | 8        |

\* Binding capacity of BTMAC in mg/mL ( $\pm$ STDEV), for modelling the grafting conditions

\*\* These grafting conditions were used for addressing the repeatability of photografting conditions, the  $c_m$  according the experimental design should have been 11.7%

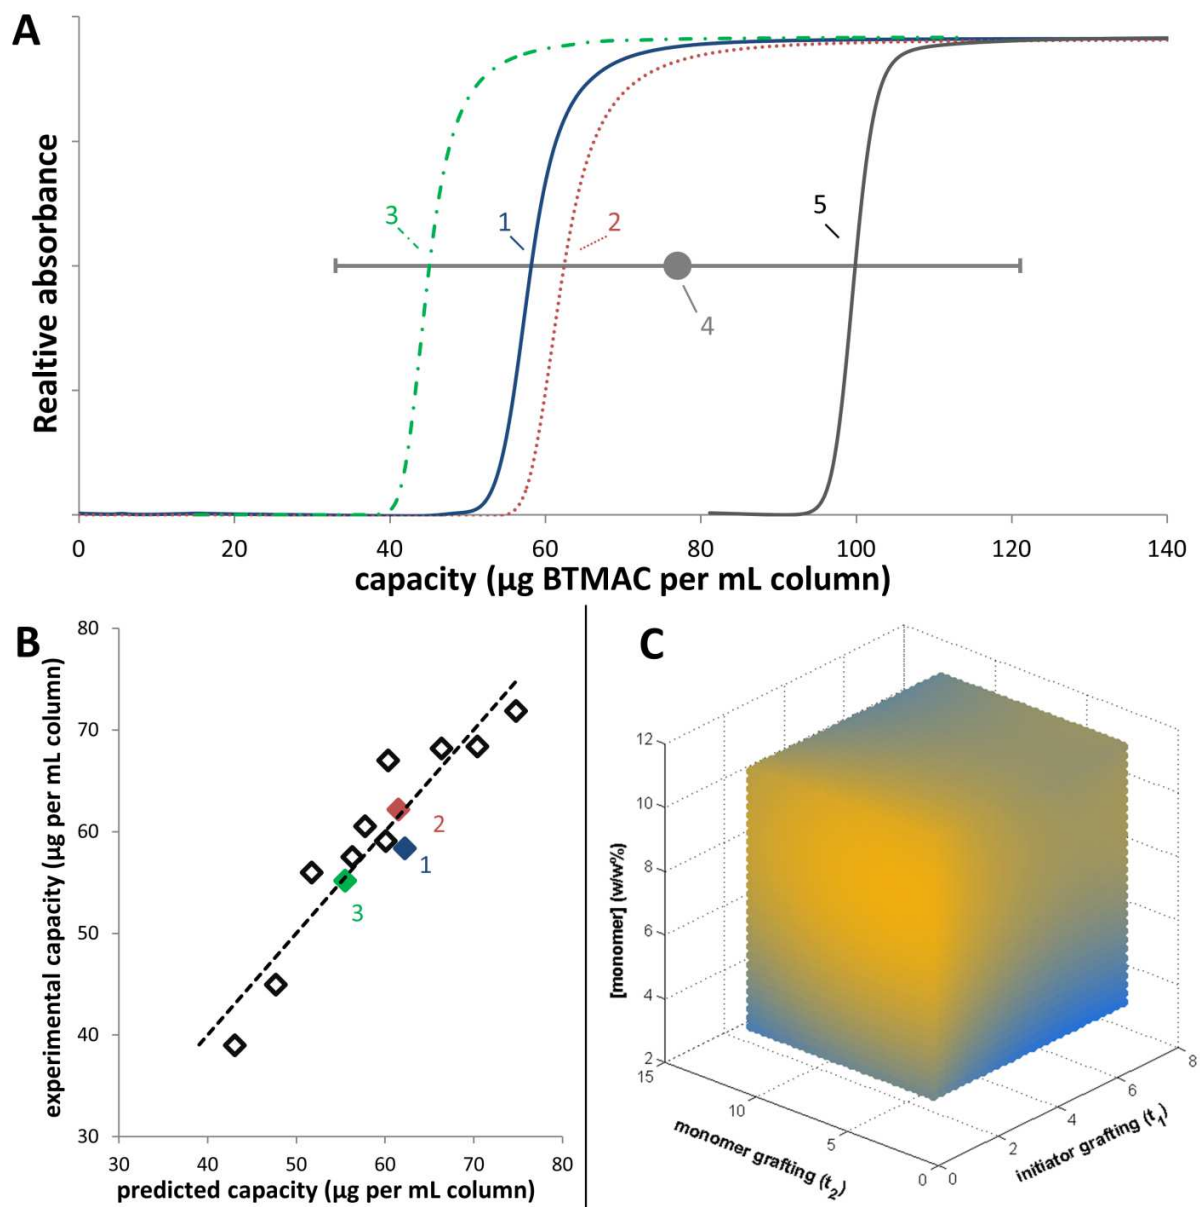

**Fig. S1** Determination of grafting yield by the breakthrough of BTMAC. In A) Breakthrough curves at varied monomer grafting times ( $t_2$ ). B) predicted vs. experimental binding capacity. C) Calculated grafting yield at all grafting conditions within the experimental design.

1)  $t_1 = 4$  min,  $t_2 = 2$  min,  $c_m = 7.5\%$ , 2)  $t_1 = 4$  min,  $t_2 = 7$  min,  $c_m = 7.5\%$  and 3)  $t_1 = 4$  min,  $t_2 = 12$  min,  $c_m = 7.5\%$ , 4) theoretical breakthrough of optimal grafting point and 5) experimental breakthrough of optimal grafting point

## Hyphenation of LC×LC with FTICR-MS/MS

In Fig. S2 the valve configuration is shown that was used for comprehensive two-dimensional LC combined with the FTICR-MS. The SCX-fractions were collected in loop I and II by switching the left valve accordingly. The collected fractions were injected in the <sup>2</sup>D effluent and online desalting was applied by trapping the peptides on the top of the analytical column, flushing the salt residue to waste. The <sup>2</sup>D effluent was split just before the MS such that the nano-electrospray flow did not exceed 500 nL·min<sup>-1</sup>.

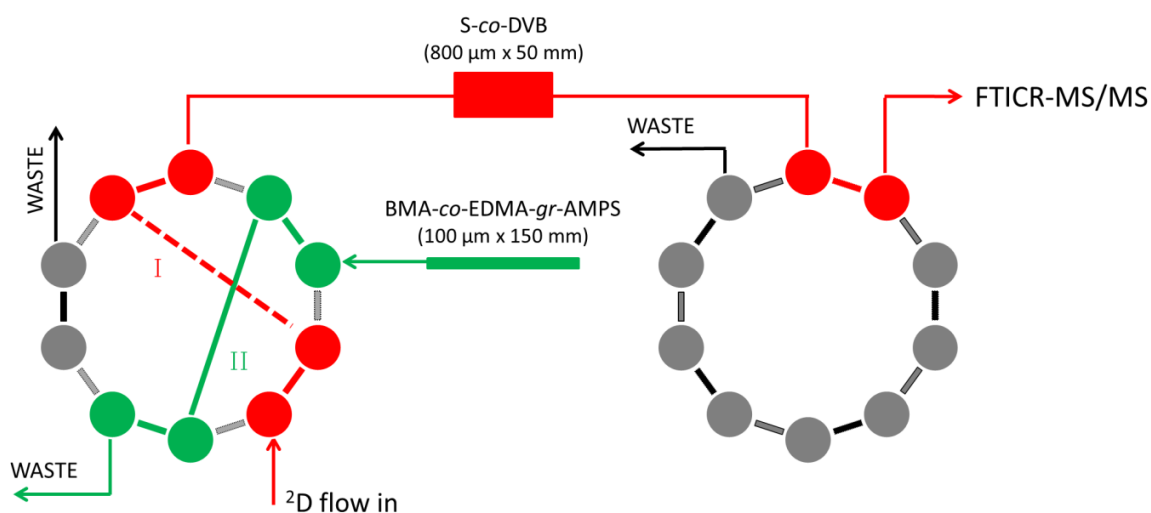

**Fig. S2** Schematic overview of valves used in LC×LC-MS setup. The RP desalting was performed by switching valve B to the 10\_1 position, elution was performed in the 1\_2 position

Detailed information on the BSA-digest peptides identified by MASCOT is provided in Table S3. The peptides were sorted by their mono-isotopic mass. Details regarding their elution fraction of the <sup>1</sup>D (SCX) and <sup>2</sup>D (RP) elution time were provided. In Fig. S3 the best-peak chromatogram (BPC) and the total-ion current (TIC) of the BSA digests were shown in comparison to the TIC of the identified peptides as was given in the main article in Fig. 4. The magenta arrows indicate extra observed peaks which might originate from non-identified peptides or from background matrix. Total sequence coverage of 60% was established.

**Table S3** Overview of identified peptides from BSA digest analysed on the 2D LC×LC-MS/MS. Identification using MASCOT

| Peptide | Peptide sequence         | Calculated Mol. Mass (Da) | SCX fraction | RP ret time (min) |
|---------|--------------------------|---------------------------|--------------|-------------------|
| 1       | GACLLPK                  | 757.4156                  | 3            | 1.00              |
| 2       | LVTDLTK                  | 788.4644                  | 3            | 0.42              |
| 3       | LCVLHEK                  | 897.4742                  | 5            | 0.22              |
| 4       | AEFVEVTK                 | 921.4807                  | 3            | 1.18              |
| 5       | YLYEIAR                  | 926.4861                  | 4            | 2.53              |
| 6       | DLGEEHFK                 | 973.4505                  | 5            | 0.32              |
| 7       | LVVSTQTALA               | 1001.5757                 | 1            | 3.38              |
| 8       | QTALVELLK                | 1013.6121                 | 4            | 4.58              |
| 9       | NECFLSHK                 | 1033.4651                 | 5            | 0.22              |
| 10      | SHCIAEVEK                | 1071.5019                 | 5            | 0.30              |
| 11      | EACFAVEGPK               | 1106.5066                 | 3            | 2.22              |
| 12      | CCTESLVNR                | 1137.4907                 | 3            | 0.23              |
| 13      | KQTALVELLK               | 1141.707                  | 9            | 3.90              |
| 14      | LVNELTEFAK               | 1162.6234                 | 3            | 4.30              |
| 15      | FKDLGEEHFK               | 1248.6139                 | 7            | 6.65              |
| 16      | HPEYAVSVLLR              | 1282.7034                 | 10           | 3.87              |
| 17      | ECCDKPLLEK               | 1290.5948                 | 4            | 0.48              |
| 18      | HLVDEPQNLIK              | 1304.7088                 | 5            | 3.42              |
| 19      | TVMENFVAFVDK             | 1398.6853                 | 4            | 6.45              |
| 20      | TVMENFVAFVDK + oxidation | 1414.6803                 | 3            | 5.38              |
| 21      | SLHTLFGDELCK             | 1418.6864                 | 7            | 4.57              |
| 22      | YICDNQDTISSK             | 1442.6347                 | 3            | 0.48              |
| 23      | ETYGDMADCCEK             | 1477.516                  | 3            | 0.67              |
| 24      | LGEYGFQNALIVR            | 1478.7881                 | 4            | 5.90              |
| 25      | EYEATLEECCA              | 1501.6065                 | 3            | 1.45              |

| Peptide | Peptide sequence              | Calculated<br>Mol. Mass (Da) | SCX fraction | RP ret time<br>(min) |
|---------|-------------------------------|------------------------------|--------------|----------------------|
| 26      | VPQVSTPTLVEVSR                | 1510.8355                    | 3            | 4.95                 |
| 27      | DDPHACYSTVFDK                 | 1553.6457                    | 4            | 3.15                 |
| 28      | DAFLGSFLYEYSR                 | 1566.7354                    | 5            | 7.00                 |
| 29      | LKPDPNTLCDEFK                 | 1575.7603                    | 4            | 4.33                 |
| 30      | KVPQVSTPTLVEVSR               | 1638.9305                    | 5            | 4.57                 |
| 31      | MPCTEDYLSLILNR                | 1723.8273                    | 5            | 7.13                 |
| 32      | MPCTEDYLSLILNR + oxidation    | 1739.8222                    | 4            | 6.68                 |
| 33      | YNGVFQECCQAEDK                | 1746.6978                    | 3            | 2.30                 |
| 34      | ECCHGDLLECADDR                | 1748.6553                    | 4            | 1.53                 |
| 35      | RPCFSALTPDETYVPK              | 1879.9138                    | 5            | 5.13                 |
| 36      | HPYFYAPELLYYANK               | 1887.9195                    | 10           | 5.82                 |
| 37      | VASLRETYGDMADCCEK             | 1889.785                     | 4            | 7.51                 |
| 38      | NECFLSHKDDSPDLPK              | 1900.8625                    | 6            | 3.47                 |
| 39      | NECFLSHKDDSPDLPK + Deaminated | 1901.8465                    | 4            | 3.92                 |
| 40      | LFTFHADICTLPDTEK              | 1906.9135                    | 5            | 6.15                 |
| 41      | CCAADDKEACFAVEGPK             | 1926.791                     | 3            | 3.17                 |
| 42      | DAIPENLPPLTADFAEDK            | 1954.992                     | 3            | 6.50                 |
| 43      | ECCHGDLLECADDRADLAK           | 2246.9354                    | 5            | 3.45                 |
| 44      | DAIPENLPPLTADFAEDKDVCK        | 2457.1733                    | 3            | 6.40                 |

**A**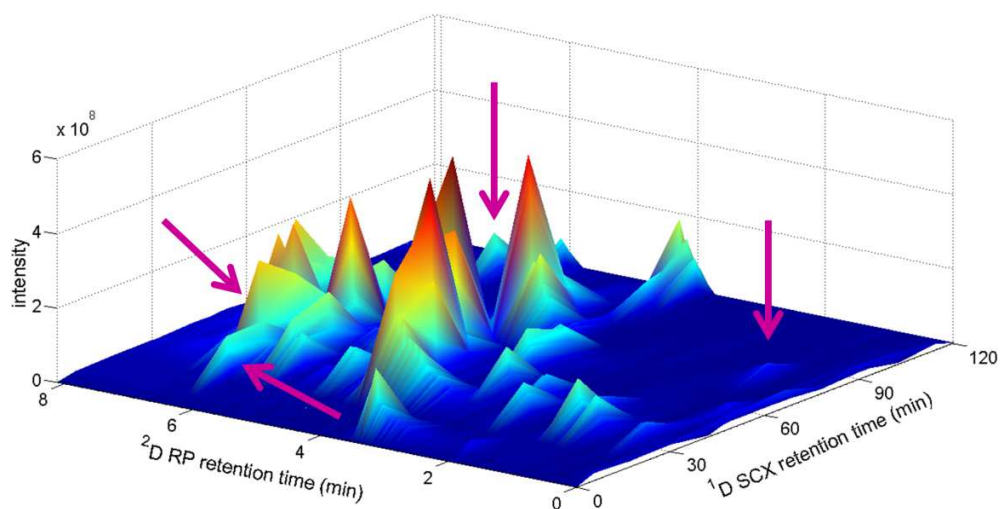**B**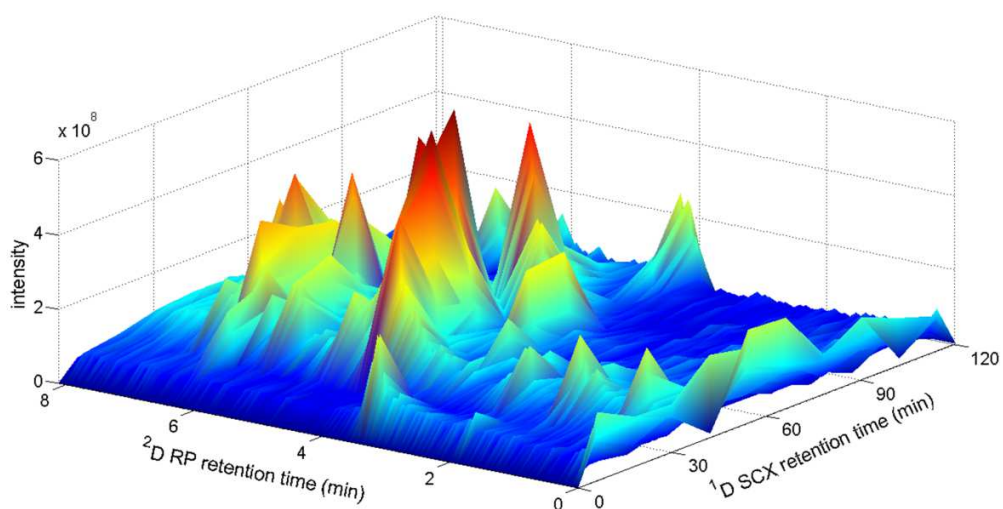

**Fig. S3** BSA digest analyses on a LC $\times$ LC-FTICR-MS giving (A) BPC and (B) TIC. As comparison to Fig. 4 in which the TIC of identified peptides is shown. The chromatograms were obtained using a  $^1$ D gradient starting with 5 min isocratic elution at 0.5 mM KCl followed by a linear increase to 125 mM in 12 min and an additional linear increase to 249.5 mM in 60 min at a flow rate of 150 nL/min and  $^2\phi$  (ACN) from 0.008 to 0.40 in 9.0 min, with 3 min de-salting and equilibration of the RP column



### Orthogonality of obtained LC×LC chromatograms

The so called “asterisk” equation ( $A_0$ ) considers all peaks in a 2D chromatogram by studying their positions with respect to four Z-lines ( $Z_-$ ,  $Z_+$ ,  $Z_1$  and  $Z_2$ ) [33]. The spreads around these lines ( $Z_n$ ) are calculated for each component (i) by Eq. (1)-(4) and used to determine the orthogonality of the chromatogram

$$Z_- = \left| 1 - 2.5 \left| \sigma \{ {}^1t_{R,norm(i)} - {}^2t_{R,norm(i)} \} - 0.4 \right| \right| \quad (1)$$

$$Z_+ = \left| 1 - 2.5 \left| \sigma \{ {}^2t_{R,norm(i)} - (1 - {}^1t_{R,norm(i)}) \} - 0.4 \right| \right| \quad (2)$$

$$Z_1 = 1 - \left| 2.5 \times \sigma \{ {}^1t_{R,norm(i)} - 0.5 \} \times \sqrt{2 - 1} \right| \quad (3)$$

$$Z_2 = 1 - \left| 2.5 \times \sigma \{ {}^2t_{R,norm(i)} - 0.5 \} \times \sqrt{2 - 1} \right| \quad (4)$$

were the  $\sigma$  = standard deviation, for all peaks within the chromatogram and both the  ${}^1t_{R,norm(i)}$  and  ${}^2t_{R,norm(i)}$  are normalized for the 1<sup>st</sup> and 2<sup>nd</sup> dimension retention time for each (i) by Eq. (5)

$$t_{R,norm(i)} = \frac{t_{R(i)} - t_{R,first}}{t_{R,last} - t_{R,first}} \quad (5)$$

The percentage of the orthogonality for the chromatogram is calculated by Eq. 6

$$A_0 = \sqrt{Z_- \times Z_+ \times Z_1 \times Z_2} \quad (6)$$

The occupation-degree of the LC×LC separation-space, along with the number of peaks eluting in each zone, are parameters affecting the value of  $A_0$ . In a fully orthogonal separation, the spread of sample components around all lines will be maximized, resulting in  $A_0 = 100\%$  [33]. In Fig. S4A a top view of the BSA digest separation obtained with LC×LC-UV experiments (Fig. 4B) is shown, together with the crossing Z-lines. In Fig S4B the 75 most abundant eluting peptides were selected and marked in the separation space. The peaks were chosen as uniquely as possible by only selecting peaks which did not occur in the previous 1<sup>D</sup> fraction within accuracy specified precision (time window) of 0.04 min of the 2<sup>D</sup> elution time. When a peak was observed in a 2<sup>D</sup>

run the highest data point was selected at the specified retention time and eventual lower peaks, at the same retention time in the previous or following <sup>2</sup>D runs were discarded. For the example shown in Fig. S3B an orthogonality of 75% was obtained.

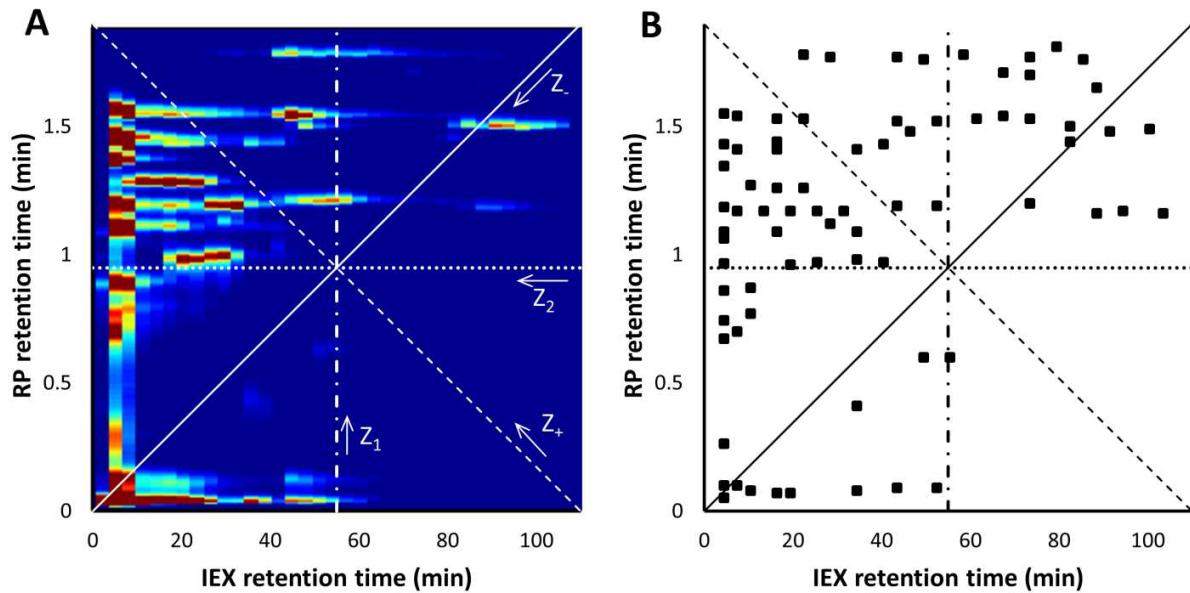

**Fig. S4A)** Top view of the comprehensive analyses of BSA digest, as show in Fig. 4B, with the crossing Z-lines **B)** overview of the 75 most abundant peptides (■) used for determination of the  $A^o$ -value
